# Supplementary material for: Docking studies and molecular dynamics simulation of triazole benzene sulfonamide derivatives with human carbonic anhydrase IX inhibition activity
Source: Royal Society of Chemistry journal article supplement (doi:10.1039/d1ra07377j), 2021-01-01
Supplement: d1ra07377j1.pdf [file d1ra07377j1.pdf]

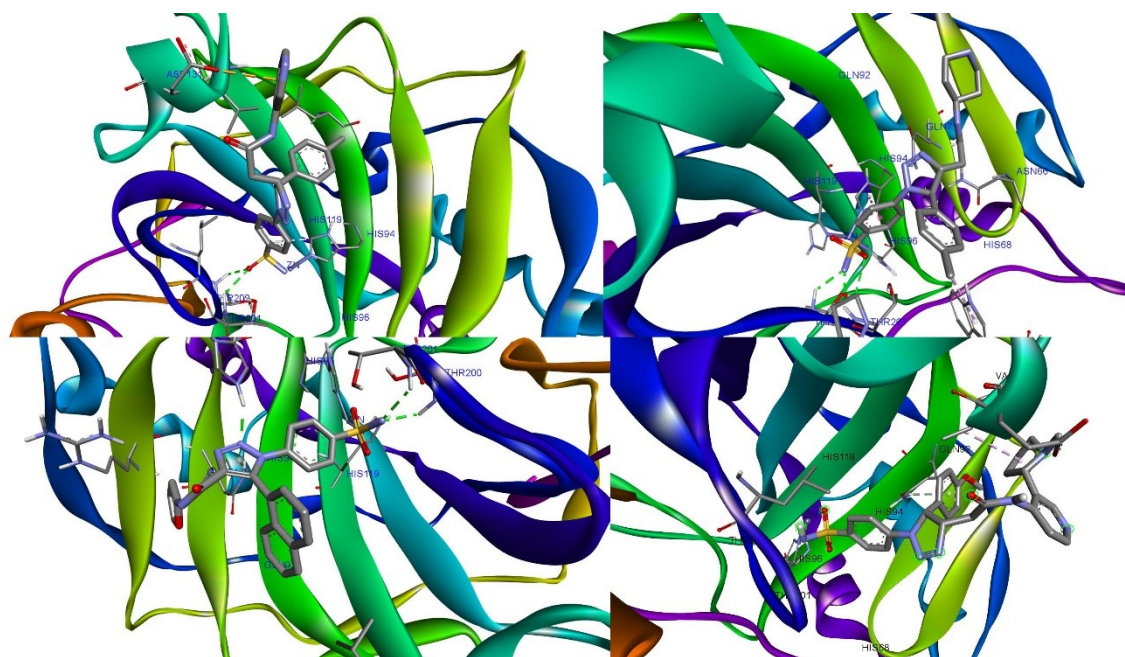

Supplementary Fig. 1: Docking interactions of compound 1 (Top left), compound 2 (Top right), compound 20 (Bottom left) and compound 24 (Bottom right)

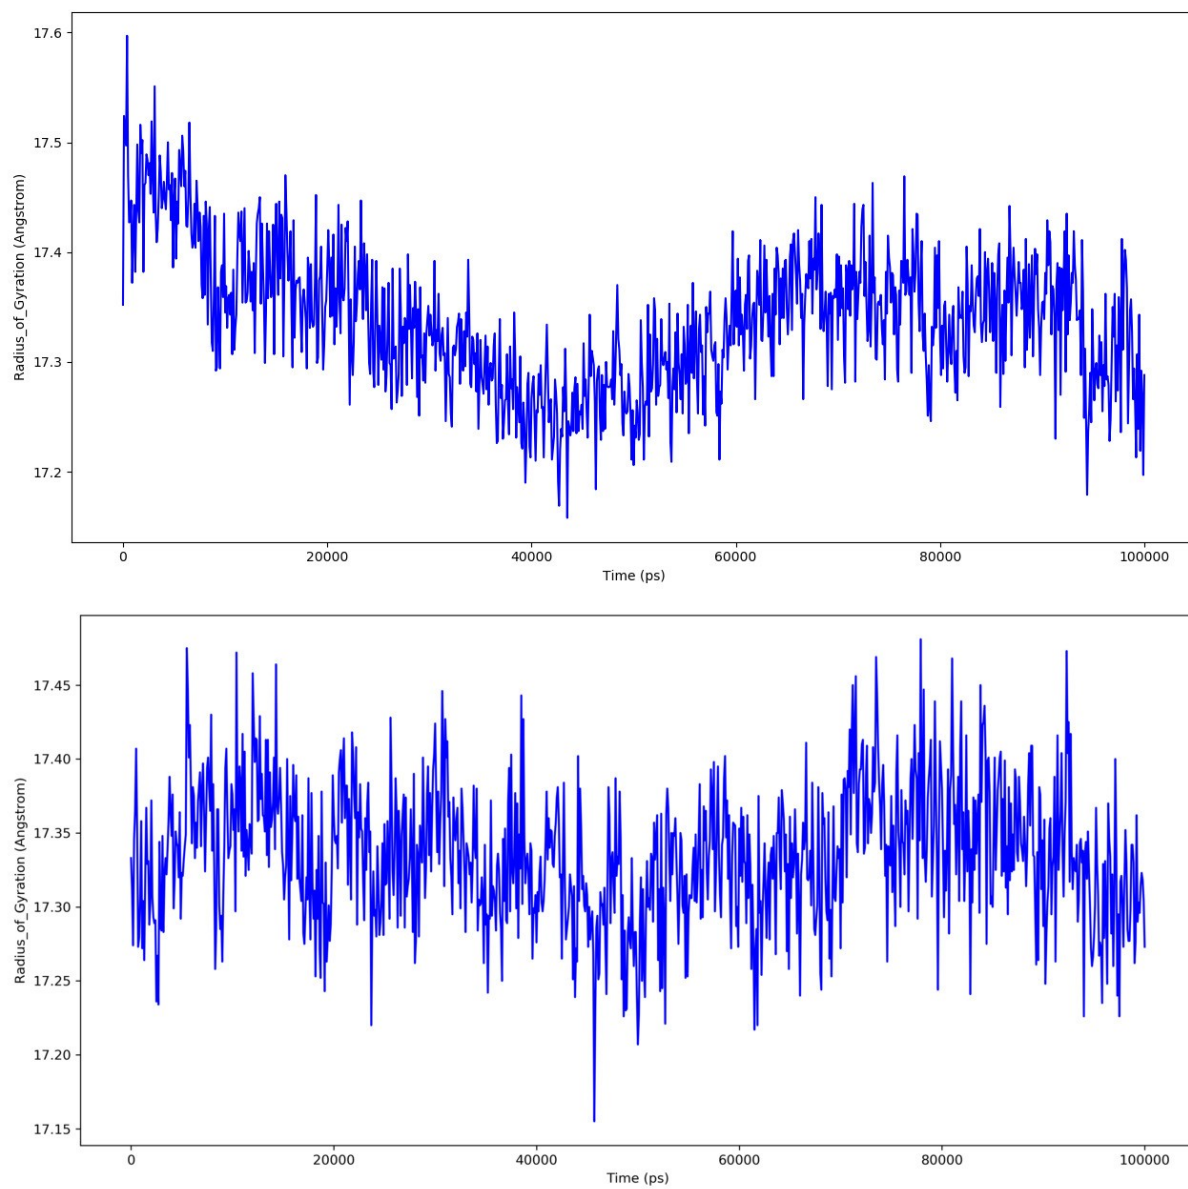

Supplementary Fig. 2: Radius of Gyration plot of 5FL4 in complex with SLC0111 (Top) and compound 27 (Bottom)

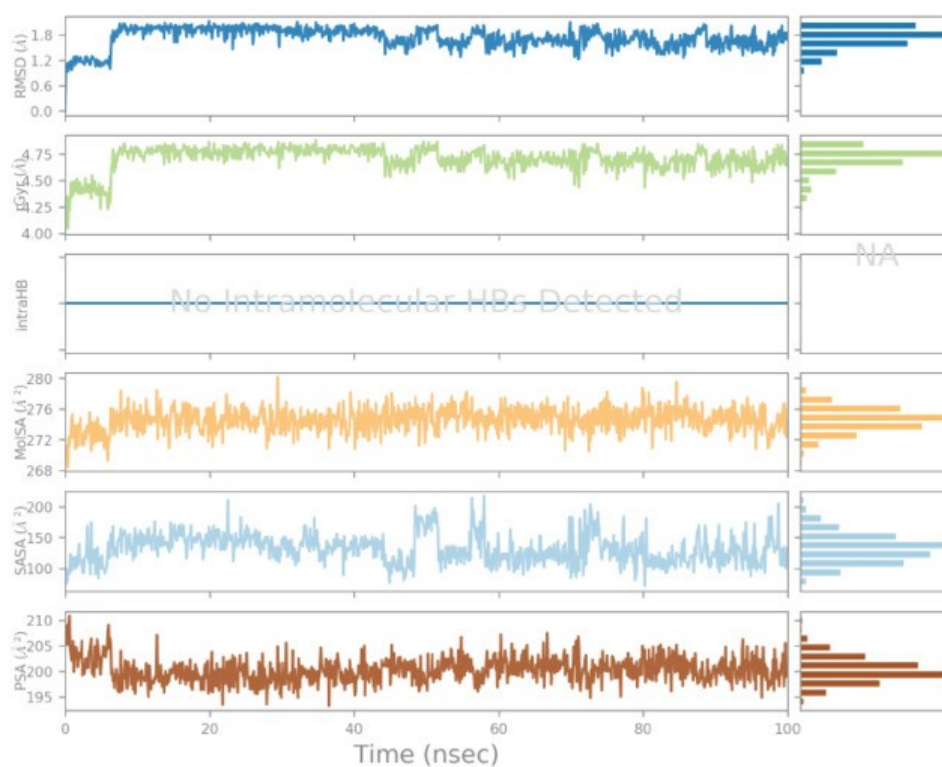

### Ligand Properties

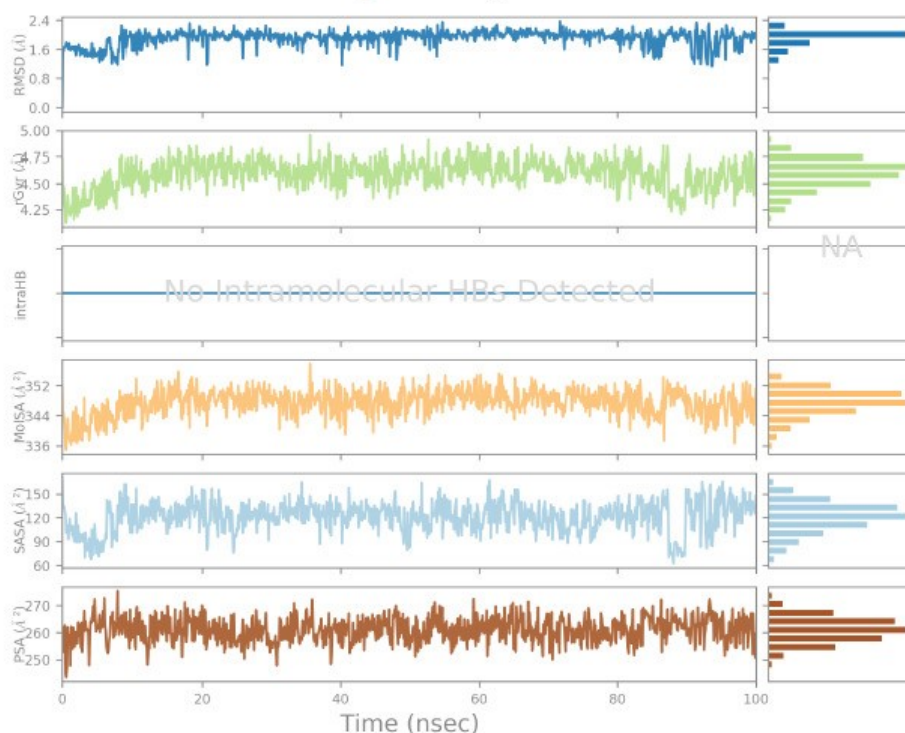

Supplementary Fig. 3: Details of RMSD, rGyr, intraHB, MolSA, SASA and PSA of SLC0111\_5FL4 (Top) and compound 27\_5FL4 (Bottom) complexes were presented.

**Supplementary Table I:** Molecular descriptor contribution information

| Sl.No. | MoRSEV22 | MoRSEC17 | MoRSEV1 | MoRSEC4 | MoRSEE2 | pKi by model eq |
|--------|----------|----------|---------|---------|---------|-----------------|
| 1      | -0.654   | 0.134    | 30.612  | 0.161   | -3.572  | 9.132303        |
| 2      | -0.426   | 0.152    | 28.108  | 0.346   | -6.375  | 9.655535        |
| 3      | -0.78    | 0.139    | 28.83   | 0.267   | -5.889  | 8.320288        |
| 4      | -0.566   | 0.115    | 28.646  | 0.292   | -6.391  | 8.593911        |
| 5      | -0.893   | 0.147    | 30.915  | 0.251   | -7.392  | 8.35372         |
| 6      | -0.62    | 0.126    | 26.367  | 0.323   | -5.658  | 8.207527        |
| 7      | -0.618   | 0.115    | 25.608  | 0.311   | -4.003  | 8.02371         |
| 8      | -0.61    | 0.152    | 25.575  | 0.295   | -5.789  | 8.410657        |
| 9      | -0.614   | 0.139    | 24.013  | 0.235   | -2.116  | 8.122925        |
| 10     | -0.583   | 0.154    | 23.011  | 0.271   | -3.775  | 8.119139        |
| 11     | -0.765   | 0.143    | 30.268  | 0.17    | -5.374  | 8.636518        |
| 12     | -0.694   | 0.147    | 26.103  | 0.268   | -5.839  | 8.110032        |
| 13     | -0.709   | 0.16     | 28.639  | 0.158   | -6.052  | 8.619526        |
| 14     | -0.541   | 0.15     | 28.96   | 0.238   | -9.131  | 8.899117        |
| 15     | -0.444   | 0.158    | 23.156  | 0.249   | -7.181  | 8.246254        |
| 16     | -0.995   | 0.118    | 34.171  | 0.262   | -8.454  | 8.196575        |
| 17     | -0.786   | 0.111    | 30.035  | 0.284   | -7.015  | 8.02662         |
| 18     | -0.697   | 0.125    | 28.36   | 0.394   | -10.153 | 8.02165         |
| 19     | -0.678   | 0.111    | 30.776  | 0.241   | -6.838  | 8.496056        |
| 20     | -0.487   | 0.163    | 29.384  | 0.18    | -2.466  | 10.04751        |
| 21     | -0.843   | 0.131    | 30.427  | 0.199   | -6.041  | 8.196424        |
| 22     | -0.605   | 0.143    | 28.544  | 0.255   | -9.791  | 8.430122        |
| 23     | -0.841   | 0.103    | 34.716  | 0.184   | -6.87   | 8.620779        |
| 24     | -0.746   | 0.173    | 35.269  | 0.262   | -9.822  | 10.03263        |
| 25     | -0.764   | 0.114    | 32.502  | 0.262   | -5.945  | 8.806199        |
| 26     | -0.995   | 0.148    | 31.343  | 0.244   | -7.552  | 8.095341        |
| 27     | -0.697   | 0.299    | 22.946  | 0.352   | -5.153  | 10.10375        |
| 28     | -0.127   | 0.134    | 19.353  | 0.008   | -0.474  | 8.317137        |
| 29     | -0.237   | 0.148    | 20.015  | 0.147   | -4.507  | 8.145953        |
| SLC    | -0.666   | 0.162    | 21.85   | 0.321   | -5.452  | 7.606996        |

**Supplementary Table II:** Molecular descriptor contribution information

| Sl.No. | MoRSEV22 | MoRSEC17 | MoRSEV1 | MoRSEC4 | MoRSEE2 | pKi by model eq |
|--------|----------|----------|---------|---------|---------|-----------------|
| 1      | -0.654   | 0.134    | 30.612  | 0.161   | -3.572  | 9.132303        |
| 2      | -0.426   | 0.152    | 28.108  | 0.346   | -6.375  | 9.655535        |
| 3      | -0.78    | 0.139    | 28.83   | 0.267   | -5.889  | 8.320288        |
| 4      | -0.566   | 0.115    | 28.646  | 0.292   | -6.391  | 8.593911        |
| 5      | -0.893   | 0.147    | 30.915  | 0.251   | -7.392  | 8.35372         |
| 6      | -0.62    | 0.126    | 26.367  | 0.323   | -5.658  | 8.207527        |
| 7      | -0.618   | 0.115    | 25.608  | 0.311   | -4.003  | 8.02371         |
| 8      | -0.61    | 0.152    | 25.575  | 0.295   | -5.789  | 8.410657        |
| 9      | -0.614   | 0.139    | 24.013  | 0.235   | -2.116  | 8.122925        |
| 10     | -0.583   | 0.154    | 23.011  | 0.271   | -3.775  | 8.119139        |
| 11     | -0.765   | 0.143    | 30.268  | 0.17    | -5.374  | 8.636518        |
| 12     | -0.694   | 0.147    | 26.103  | 0.268   | -5.839  | 8.110032        |
| 13     | -0.709   | 0.16     | 28.639  | 0.158   | -6.052  | 8.619526        |
| 14     | -0.541   | 0.15     | 28.96   | 0.238   | -9.131  | 8.899117        |
| 15     | -0.444   | 0.158    | 23.156  | 0.249   | -7.181  | 8.246254        |
| 16     | -0.995   | 0.118    | 34.171  | 0.262   | -8.454  | 8.196575        |
| 17     | -0.786   | 0.111    | 30.035  | 0.284   | -7.015  | 8.02662         |
| 18     | -0.697   | 0.125    | 28.36   | 0.394   | -10.153 | 8.02165         |
| 19     | -0.678   | 0.111    | 30.776  | 0.241   | -6.838  | 8.496056        |
| 20     | -0.487   | 0.163    | 29.384  | 0.18    | -2.466  | 10.04751        |
| 21     | -0.843   | 0.131    | 30.427  | 0.199   | -6.041  | 8.196424        |
| 22     | -0.605   | 0.143    | 28.544  | 0.255   | -9.791  | 8.430122        |
| 23     | -0.841   | 0.103    | 34.716  | 0.184   | -6.87   | 8.620779        |
| 24     | -0.746   | 0.173    | 35.269  | 0.262   | -9.822  | 10.03263        |
| 25     | -0.764   | 0.114    | 32.502  | 0.262   | -5.945  | 8.806199        |
| 26     | -0.995   | 0.148    | 31.343  | 0.244   | -7.552  | 8.095341        |
| 27     | -0.697   | 0.299    | 22.946  | 0.352   | -5.153  | 10.10375        |
| 28     | -0.127   | 0.134    | 19.353  | 0.008   | -0.474  | 8.317137        |
| 29     | -0.237   | 0.148    | 20.015  | 0.147   | -4.507  | 8.145953        |
| SLC    | -0.666   | 0.162    | 21.85   | 0.321   | -5.452  | 7.606996        |

**Supplementary table III:** ADMET profiles of selected docked compounds from pkCSM server.

| <b>Property</b>     | <b>Model Name</b>             | <b>Predicted Value of Compound 1</b> | <b>Predicted Value of Compound 2</b> | <b>Predicted Value of Compound 20</b> | <b>Predicted Value of Compound 24</b> | <b>Predicted Value of Compound 27</b> | <b>Predicted Value of SLC0111</b> | <b>Unit</b>                                 |
|---------------------|-------------------------------|--------------------------------------|--------------------------------------|---------------------------------------|---------------------------------------|---------------------------------------|-----------------------------------|---------------------------------------------|
| <b>Absorption</b>   | Water solubility              | -3.36                                | -3.477                               | -3.49                                 | -3.157                                | -4.265                                | -3.796                            | Numeric (log mol/L)                         |
| <b>Absorption</b>   | Caco2 permeability            | 0.662                                | -0.189                               | 0.312                                 | 0.428                                 | 0.343                                 | 0.886                             | Numeric (log Papp in 10 <sup>-6</sup> cm/s) |
| <b>Absorption</b>   | Intestinal absorption (human) | 71.219                               | 63.432                               | 88.29                                 | 64.057                                | 73.451                                | 78.641                            | Numeric (% Absorbed)                        |
| <b>Absorption</b>   | Skin Permeability             | -2.736                               | -2.736                               | -2.735                                | -2.735                                | -2.736                                | -2.857                            | Numeric (log Kp)                            |
| <b>Absorption</b>   | P-glycoprotein substrate      | Yes                                  | Yes                                  | Yes                                   | Yes                                   | Yes                                   | Yes                               | Categorical (Yes/No)                        |
| <b>Absorption</b>   | P-glycoprotein I inhibitor    | No                                   | Yes                                  | Yes                                   | Yes                                   | Yes                                   | No                                | Categorical (Yes/No)                        |
| <b>Absorption</b>   | P-glycoprotein II inhibitor   | Yes                                  | No                                   | Yes                                   | Yes                                   | No                                    | No                                | Categorical (Yes/No)                        |
| <b>Distribution</b> | VDss (human)                  | -0.212                               | 0.496                                | -0.678                                | 0.465                                 | -0.761                                | -0.883                            | Numeric (log L/kg)                          |
| <b>Distribution</b> | Fraction unbound (human)      | 0.15                                 | 0.249                                | 0.154                                 | 0.155                                 | 0                                     | 0.129                             | Numeric (Fu)                                |
| <b>Distribution</b> | BBB permeability              | -1.002                               | -0.921                               | -0.452                                | -1.167                                | -1.588                                | -0.872                            | Numeric (log BB)                            |
| <b>Distribution</b> | CNS permeability              | -2.803                               | -3.204                               | -2.596                                | -3.066                                | -3.672                                | -2.527                            | Numeric (log PS)                            |
| <b>Metabolism</b>   | CYP2D6 substrate              | No                                   | No                                   | No                                    | No                                    | No                                    | No                                | Categorical (Yes/No)                        |

|                   |                                   |       |       |       |       |       |       |                            |
|-------------------|-----------------------------------|-------|-------|-------|-------|-------|-------|----------------------------|
| <b>Metabolism</b> | CYP3A4 substrate                  | Yes   | Yes   | Yes   | Yes   | No    | No    | Categorical (Yes/No)       |
| <b>Metabolism</b> | CYP1A2 inhibitor                  | No    | No    | No    | No    | Yes   | No    | Categorical (Yes/No)       |
| <b>Metabolism</b> | CYP2C19 inhibitor                 | No    | No    | Yes   | No    | No    | No    | Categorical (Yes/No)       |
| <b>Metabolism</b> | CYP2C9 inhibitor                  | Yes   | No    | Yes   | No    | No    | No    | Categorical (Yes/No)       |
| <b>Metabolism</b> | CYP2D6 inhibitor                  | No    | No    | No    | No    | No    | No    | Categorical (Yes/No)       |
| <b>Metabolism</b> | CYP3A4 inhibitor                  | Yes   | No    | No    | Yes   | No    | No    | Categorical (Yes/No)       |
| <b>Excretion</b>  | Total Clearance                   | 0.422 | 0.593 | 0.488 | 0.582 | 0.114 | 0.401 | Numeric (log ml/min/kg)    |
| <b>Excretion</b>  | Renal OCT2 substrate              | No    | No    | No    | No    | No    | No    | Categorical (Yes/No)       |
| <b>Toxicity</b>   | AMES toxicity                     | No    | No    | No    | No    | No    | No    | Categorical (Yes/No)       |
| <b>Toxicity</b>   | Max. tolerated dose (human)       | 0.103 | 0.004 | 0.586 | 0.029 | 0.43  | 0.615 | Numeric (log mg/kg/day)    |
| <b>Toxicity</b>   | hERG I inhibitor                  | No    | No    | No    | No    | No    | No    | Categorical (Yes/No)       |
| <b>Toxicity</b>   | hERG II inhibitor                 | Yes   | Yes   | Yes   | Yes   | Yes   | No    | Categorical (Yes/No)       |
| <b>Toxicity</b>   | Oral Rat Acute Toxicity (LD50)    | 2.291 | 2.843 | 3.407 | 2.388 | 2.171 | 1.028 | Numeric (mol/kg)           |
| <b>Toxicity</b>   | Oral Rat Chronic Toxicity (LOAEL) | 2.286 | 1.409 | 2.112 | 2.1   | 2.594 | 1.807 | Numeric (log mg/kg_bw/day) |
| <b>Toxicity</b>   | Hepatotoxicity                    | Yes   | Yes   | Yes   | Yes   | Yes   | No    | Categorical (Yes/No)       |
| <b>Toxicity</b>   | Skin Sensitisation                | No    | No    | No    | No    | No    | No    | Categorical                |

---

|                 |                               |              |              |              |              |              |              |                                   |
|-----------------|-------------------------------|--------------|--------------|--------------|--------------|--------------|--------------|-----------------------------------|
| <b>Toxicity</b> | <i>T.Pyriiformis</i> toxicity | <b>0.296</b> | <b>0.303</b> | <b>0.285</b> | <b>0.285</b> | <b>0.29</b>  | <b>0.383</b> | (Yes/No)<br>Numeric (log<br>ug/L) |
| <b>Toxicity</b> | Minnow toxicity               | <b>0.81</b>  | <b>5.287</b> | <b>0.182</b> | <b>1.453</b> | <b>0.501</b> | <b>2.916</b> | Numeric (log<br>mM)               |
